# Supplementary material for: Senolytic agent ABT-263 mitigates low- and high-LET radiation-induced gastrointestinal cancer development in Apc1638N/+ mice
Source: publisher site journal article supplement (doi:10.18632/aging.206183), 2025-01-08
Supplement: Supplementary file [file aging-v16-206183-supplementary-material-SD1.pdf]

SUPPLEMENTARY FIGURES

**A**

|    | A        | B      | C         | D     | E      | F            | G        | H        | I       | J       | K       | L          | M      | N          |
|----|----------|--------|-----------|-------|--------|--------------|----------|----------|---------|---------|---------|------------|--------|------------|
| 1  | POS      | POS    | NEG       | NEG   | BLANK  | Axl          | CXCL13   | TNFSF8   | TNFRSF8 | TNFRSF5 | CRG2    | CCL27      | CXCL16 | Eotaxin1   |
| 2  | Eotaxin2 | TNFSF6 | CX2CL1    | GCSF  | GM-CSF | IFNg         | IGFBP3   | IGFBP5   | IGFBP6  | IL1a    | IL1b    | IL2        | IL3    | IL3Rb      |
| 3  | IL4      | IL5    | IL6       | IL9   | IL10   | IL12 P40/p70 | IL12 p70 | IL13     | HL7A    | CXCL1   | LeptinR | Leptin     | LIX    | L-Selectin |
| 4  | XCL1     | CCL2   | MCP5      | MCSF  | CXCL9  | CCL3         | MIP1g    | MIP2     | CCL19   | CCL20   | CXCL4   | P-Selectin | CCL5   | SCF        |
| 5  | SDF1a    | CCL17  | TCA3/CCL1 | CCL25 | TIPM1  | TNFa         | TNFRSF1A | TNFRSF1B | TPO     | VCAM1   | VEGFa   | BLANK      | BLANK  | POS        |
| 6  |          |        |           |       |        |              |          |          |         |         |         |            |        |            |
| 7  |          |        |           |       |        |              |          |          |         |         |         |            |        |            |
| 8  |          |        |           |       |        |              |          |          |         |         |         |            |        |            |
| 9  |          |        |           |       |        |              |          |          |         |         |         |            |        |            |
| 10 |          |        |           |       |        |              |          |          |         |         |         |            |        |            |

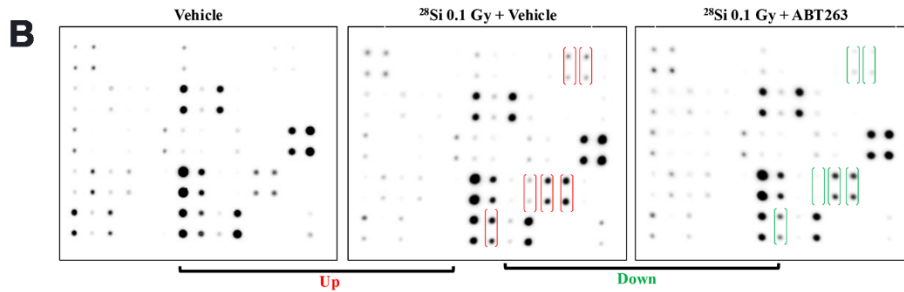

**Supplementary Figure 1. Mouse cytokine array.** (A) Spot map of mouse cytokine array C3 spot map (Cat#AAM-Cyt3; RayBiotech) in tabular form. Each antibody is spotted in duplicate as vertical dots. (B) Representative electrochemiluminescence (ECL) image depicting differential expression of serum cytokine levels in the respective groups. Highlighted proteins were upregulated after 28Si exposure and were mitigated using ABT-263.

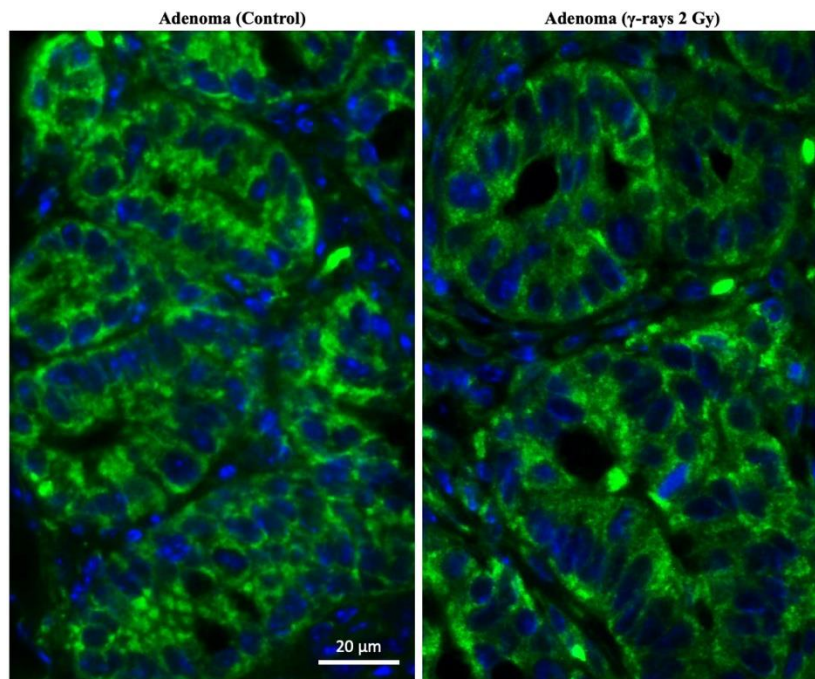

**Supplementary Figure 2.** Immunofluorescence-based assessment of BCL-XL (green color) protein expression in formalin-fixed paraffin embedded tumor tissue sections from control (spontaneous) and IR-exposed *Apc1638N/+* mice.

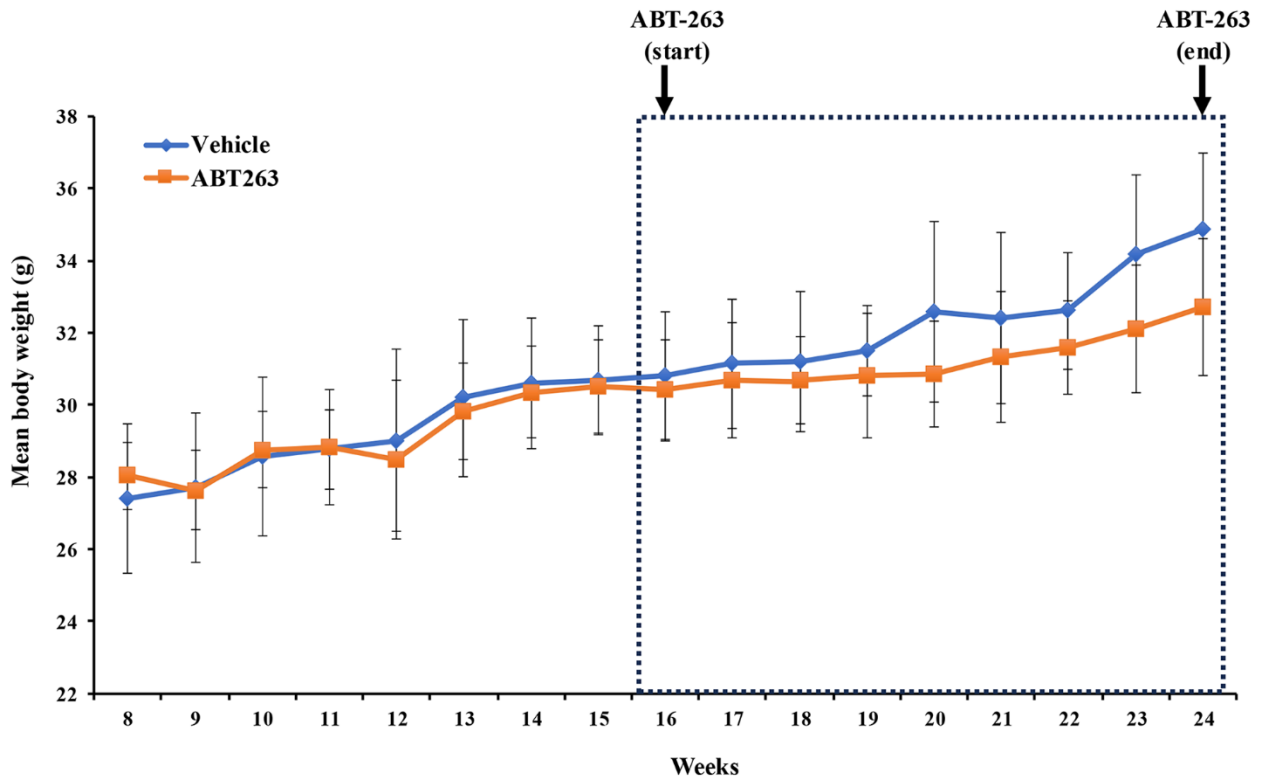

**Supplementary Figure 3. Effect of ABT-263 on mouse body weight.** Beginning sixteen weeks of age (marked by dotted box), ABT-263 was administered through oral gavage (5 days/week) until euthanasia and body weight was recorded weekly and presented as mean body weight in grams (g). Error bars are representing the standard deviation (SD) from the mean value.

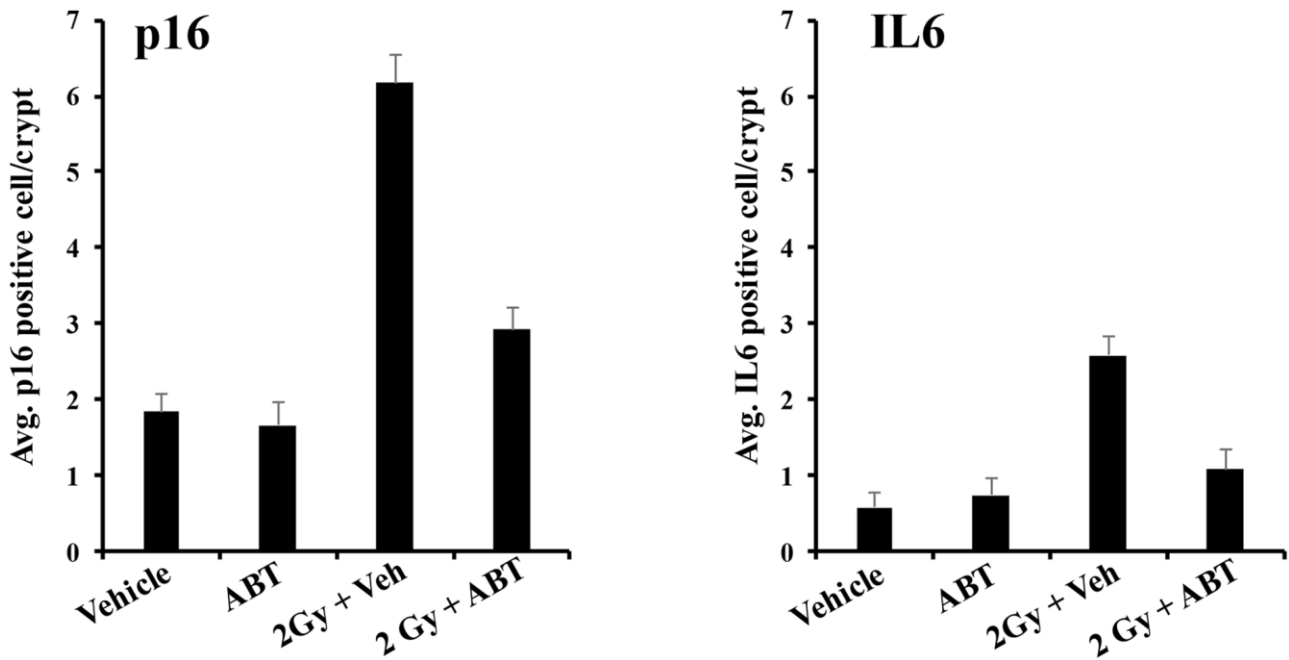

**Supplementary Figure 4.** Immunofluorescence-based quantification of senescent (p16 positive) and SASP (IL6 positive) cells in the *Apc*<sup>1638N/+</sup> mice jejunal crypts.
